# Supplementary material for: Gallium (III) Complexes with 5-Bromosalicylaldehyde Benzoylhydrazones: In Silico Studies and In Vitro Cytotoxic Activity
Source: MDPI journal article supplement (doi:10.3390/molecules27175493), 2022-08-26
Supplement: s1 [file s1]

## Supplementary data

The structures of 5-bromosalicylaldehyde benzoylhydrazone (**5BrSBH**), 5-bromosalicylaldehyde-4-hydroxybenzoylhydrazone ( $H_2L^1$ ), and 5-bromosalicylaldehyde isonicotinoylhydrazone ( $H_2L^2$ ) are determined experimentally by X-ray diffraction [S1-S3]. In order to predict the molecular structures of the ligands, quantum-chemical calculations were carried out. The structural parameters of the hydrazones (5-bromosalicylaldehyde benzoylhydrazone **5BrSBH**, 5-bromosalicylaldehyde-4-hydroxybenzoyl-hydrazone  $H_2L^1$ , and 5-bromosalicylaldehyde isonicotinoylhydrazone  $H_2L^2$ ) were computed at the B3LYP level of theory using a 6-31+G (d, p) basis set. The calculated bond lengths and angles were compared with the experimental crystallographic data for **5BrSBH**,  $H_2L^1$ , and  $H_2L^2$ . As listed in Table S1, the calculated bond values are in good agreement with the experimental electron diffraction data. A small difference appears between the measured and the calculated O-H bond, due to the possible involvement of a hydroxyl group in an intramolecular O-H...N hydrogen bond. The values of the calculated angles perfectly match the experimentally measured ones. Therefore, it can be concluded that the substitutions in the hydrazide aromatic nuclei have not influenced the geometries of the new derivatives, and all compounds have similar structures.

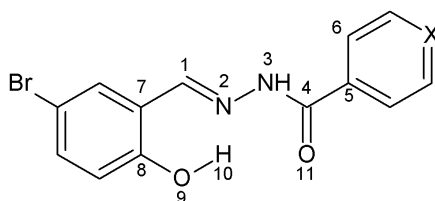

**5BrSBH**: X=CH

$H_2L^1$ : X=C-OH

$H_2L^2$ : X=N

Table S1. Selected bond lengths ( $\text{\AA}$ ) and angles ( $^\circ$ ) for 5-bromosalicylaldehyde derivatives.

| Selected geometric parameters ( $\text{\AA}$ , $^\circ$ ) | <b>5BrSBH</b> exp. [S1] | <b>5BrSBH</b> calc. | $H_2L^1$ exp. [S2] | $H_2L^1$ calc. | $H_2L^2$ exp. [S3] | $H_2L^2$ calc. |
|-----------------------------------------------------------|-------------------------|---------------------|--------------------|----------------|--------------------|----------------|
| C1-N2                                                     | 1.275                   | 1.290               | 1.288              | 1.290          | 1.270              | 1.290          |
| N2-N3                                                     | 1.362                   | 1.357               | 1.365              | 1.357          | 1.369              | 1.359          |
| N3-C4                                                     | 1.363                   | 1.389               | 1.364              | 1.391          | 1.353              | 1.384          |
| C4-C5                                                     | 1.479                   | 1.499               | 1.483              | 1.494          | 1.507              | 1.504          |
| C4-O11                                                    | 1.223                   | 1.221               | 1.228              | 1.222          | 1.204              | 1.221          |

|           |       |       |       |       |       |       |
|-----------|-------|-------|-------|-------|-------|-------|
| C1-C7     | 1.456 | 1.452 | 1.458 | 1.453 | 1.450 | 1.451 |
| C8-O9     | 1.345 | 1.345 | 1.365 | 1.345 | 1.351 | 1.345 |
| O9-H10    | 0.820 | 0.987 | 0.764 | 0.987 | 0.820 | 0.986 |
|           |       |       |       |       |       |       |
| C1-N2-N3  | 119.0 | 119.0 | 117.8 | 119.0 | 119.7 | 118.8 |
| N2-N3-C4  | 118.5 | 119.8 | 118.8 | 119.8 | 115.1 | 119.8 |
| N3-C4-O11 | 121.3 | 122.1 | 120.7 | 121.7 | 122.3 | 122.7 |
| N3-C4-C5  | 115.7 | 114.9 | 117.8 | 115.2 | 116.1 | 114.7 |
| C5-C4-O11 | 123.1 | 123.0 | 121.6 | 123.0 | 121.6 | 122.4 |
| C1-C7-C8  | 122.0 | 121.9 | 122.9 | 121.9 | 122.0 | 121.9 |

[S1] H.-Y. Liu, H.-Y. Wang, F. Gao, Z.-S. Lu, D.-Z. Niu, 5-Bromosalicylaldehyde benzoylhydrazone Acta Cryst. (2006). E62, o4495–o4496, doi:10.1107/S160053680603683X.

[S2] Z.-L. Jing, M. Yu, X. Chen, (E)-N'-(5-Bromo-2-hydroxybenzylidene)- 4-hydroxybenzohydrazide ethanol solvate Acta Cryst. (2007). E63, o4902, doi:10.1107/S1600536807060667.

[S3] D.-S. Yang, N'-[1-(5-Bromo-2-hydroxyphenyl)methylidene]- isonicotinohydrazide, Acta Cryst. (2006). E62, o3792–o3793, doi:10.1107/S1600536806030765.

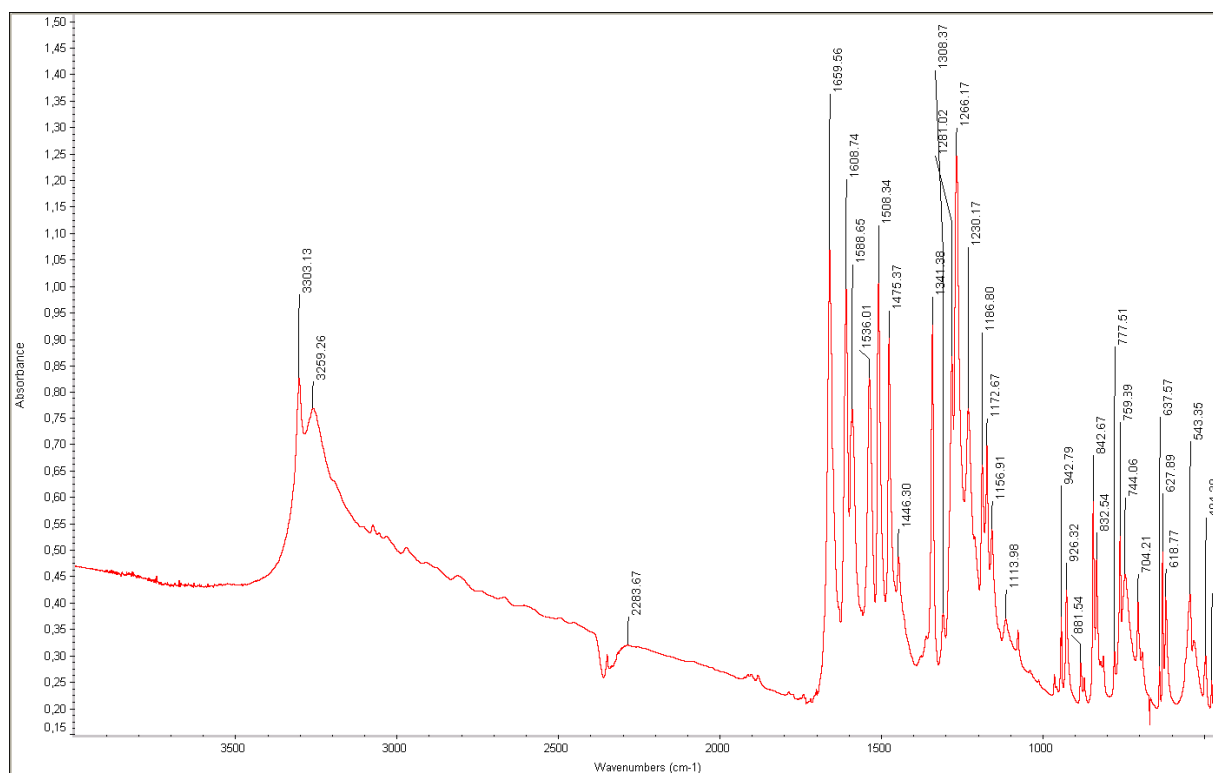

Figure S1. IR spectra of the ligand H<sub>2</sub>L<sup>1</sup>.

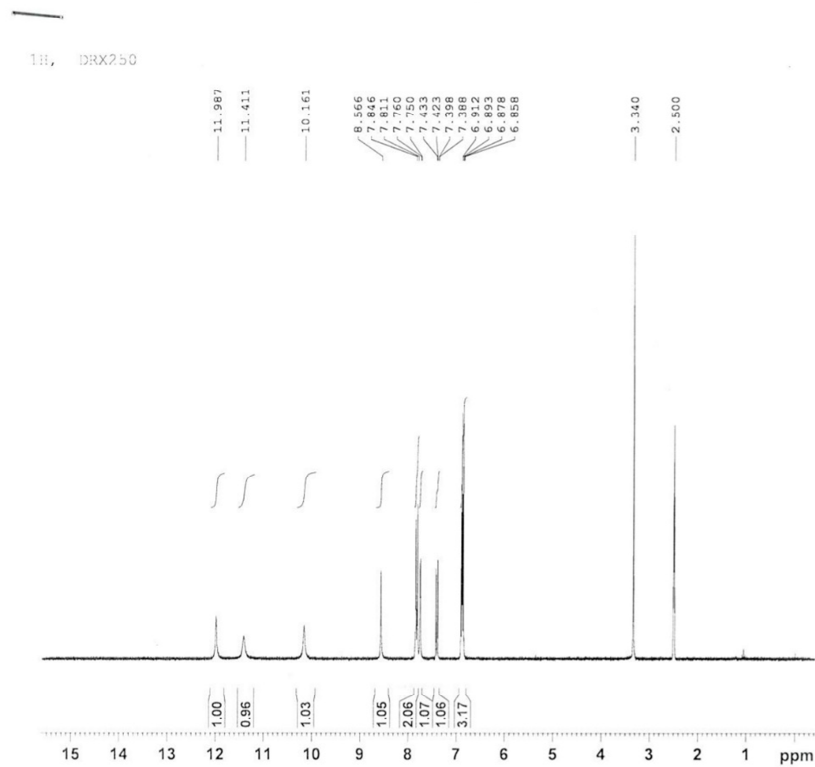

Figure S2. <sup>1</sup>H NMR spectra of the ligand H<sub>2</sub>L<sup>1</sup>.

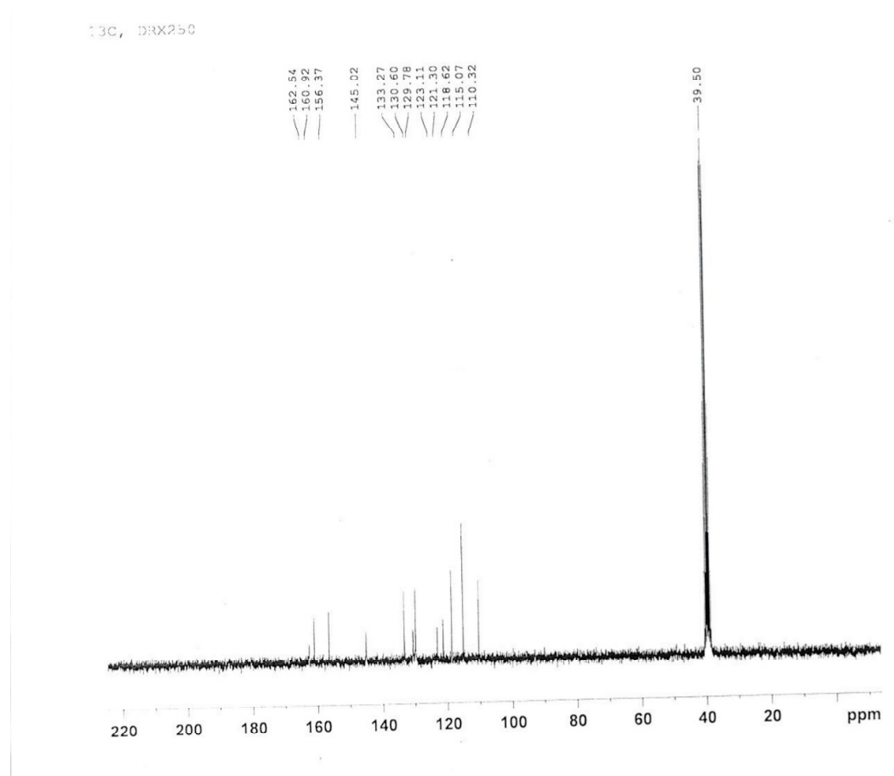

Figure S3. <sup>13</sup>C NMR spectra of the ligand H<sub>2</sub>L<sup>1</sup>.

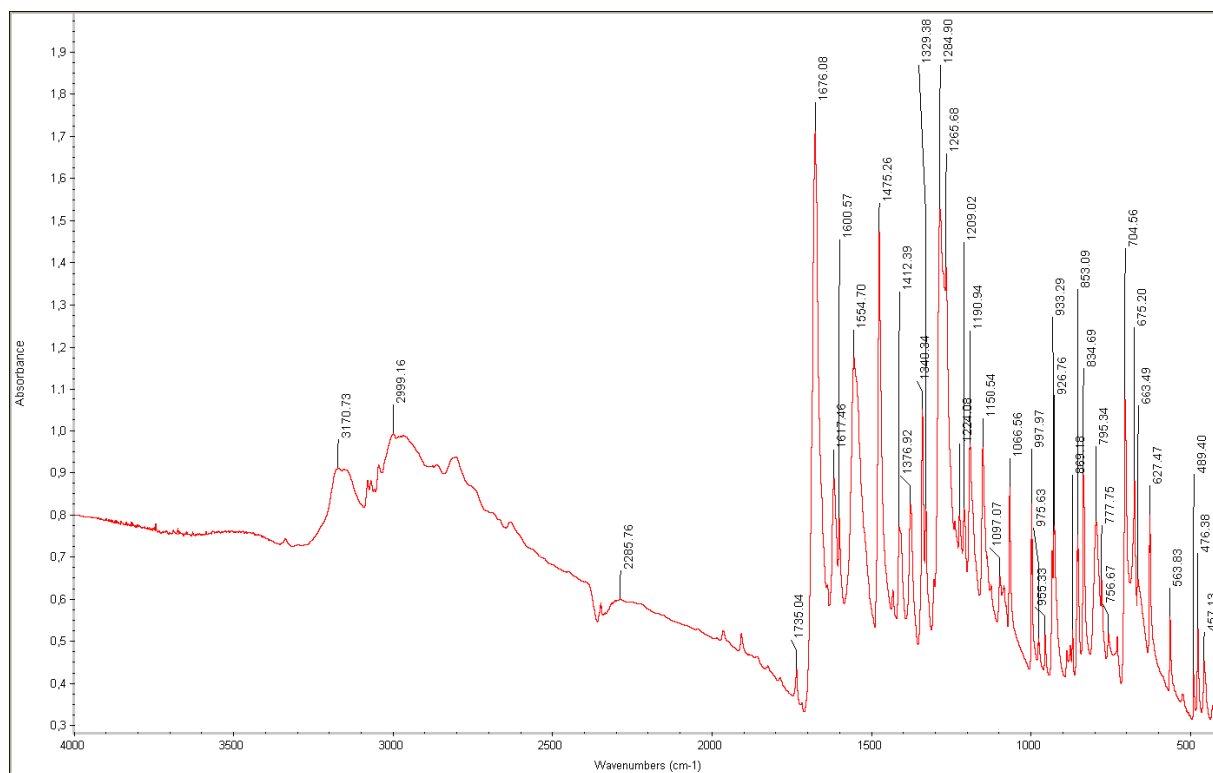

Figure S4. IR spectra of the ligand  $H_2L^2$ .

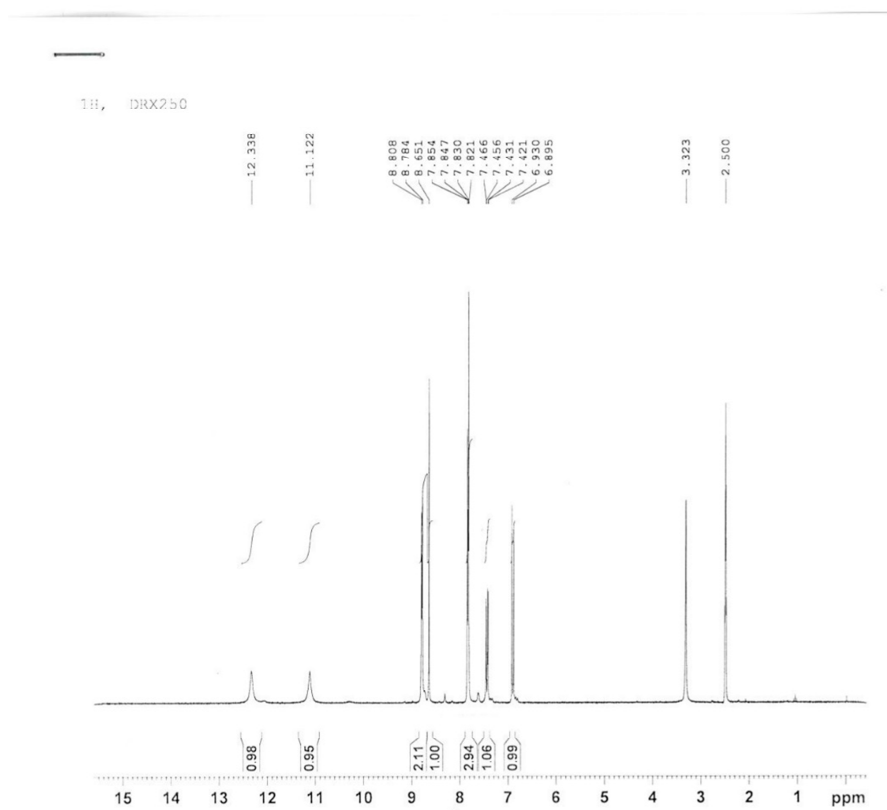

Figure S5. <sup>1</sup>H NMR spectra of the ligand H<sub>2</sub>L<sup>2</sup>.

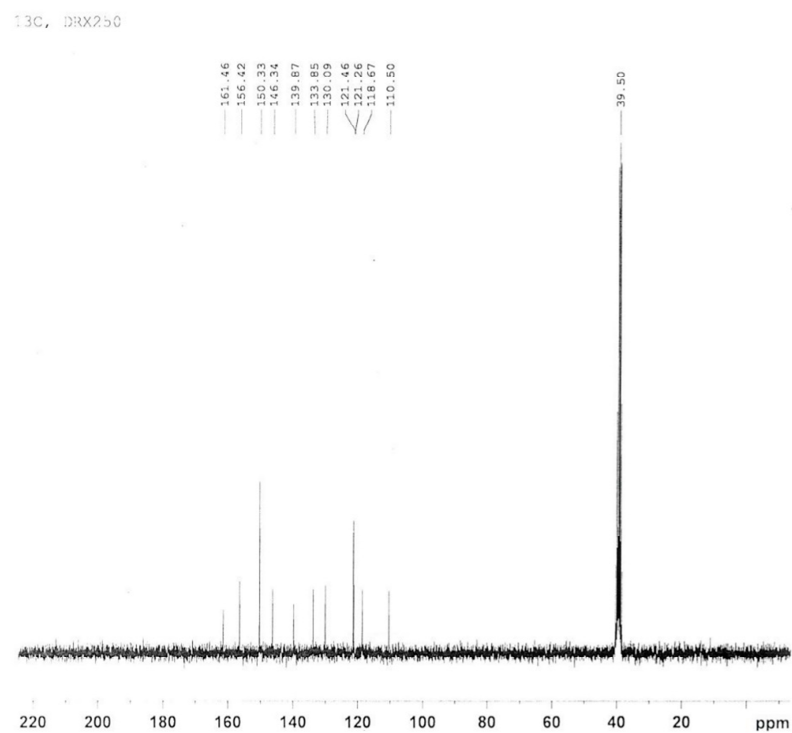

Figure S6. <sup>13</sup>C NMR spectra of the ligand H<sub>2</sub>L<sup>2</sup>.

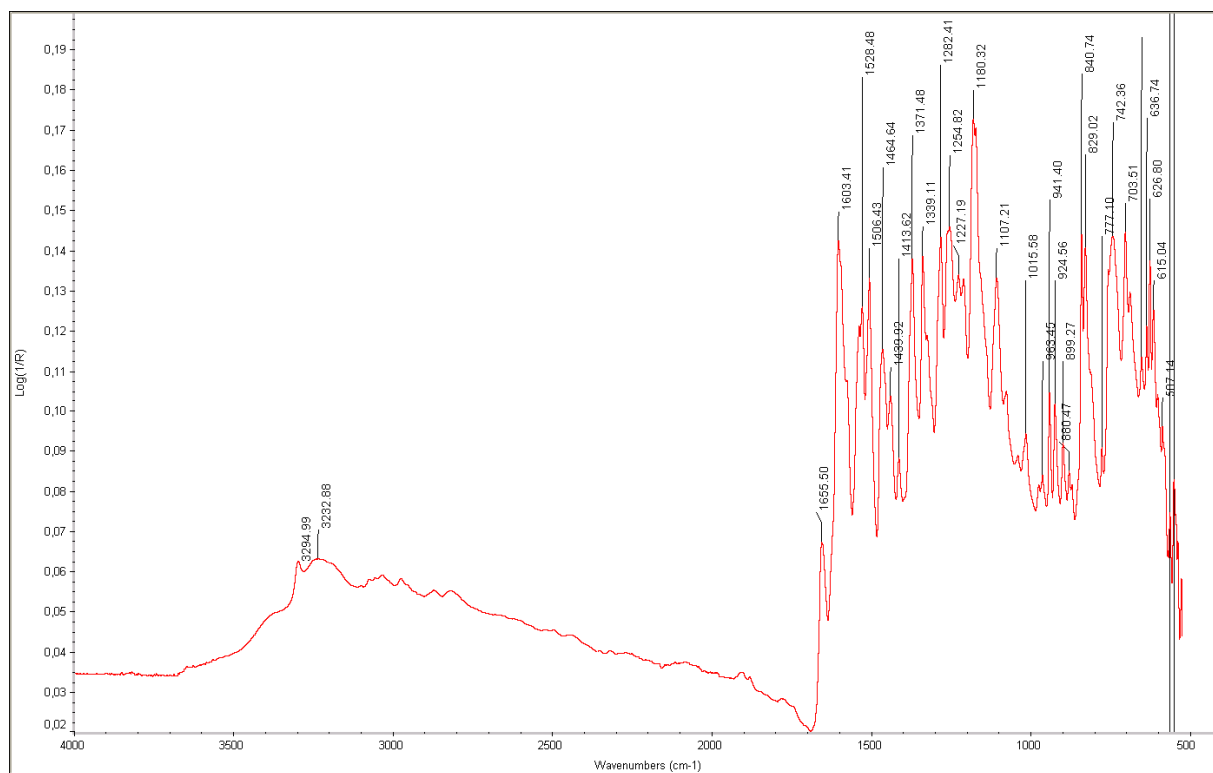

Figure S7. IR spectra of Complex 1.



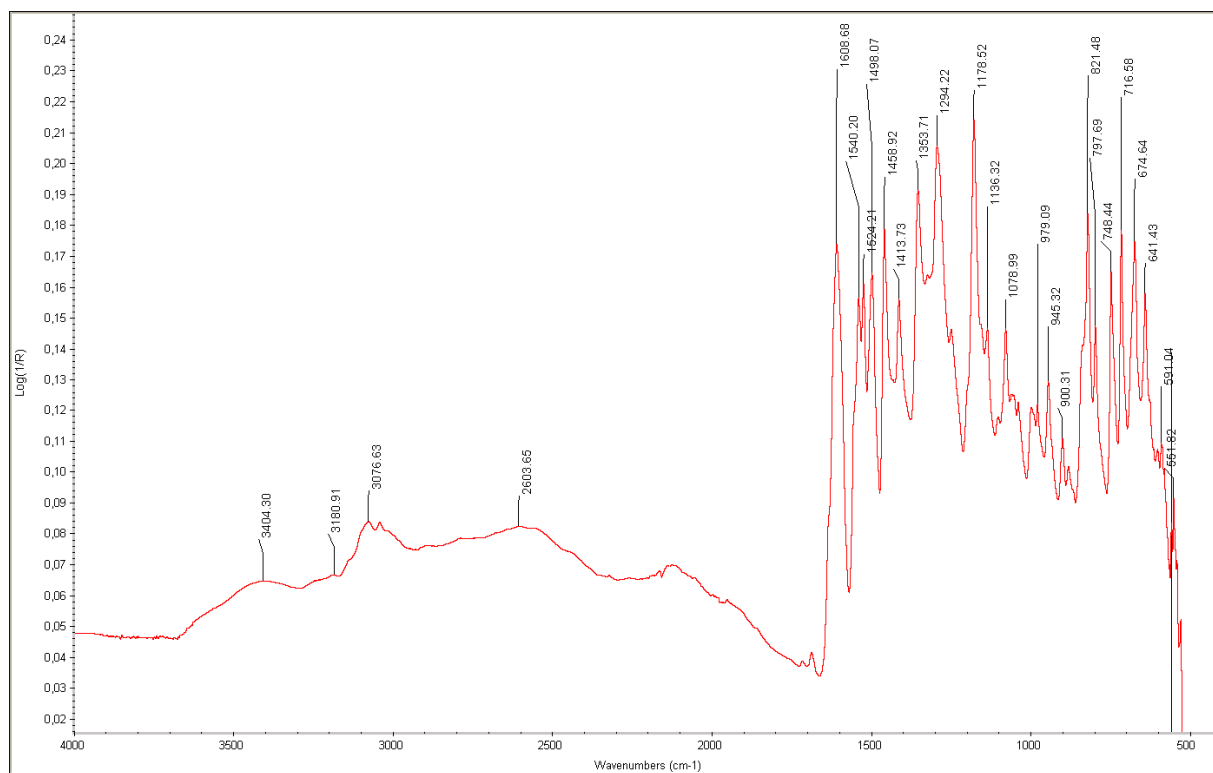

Figure S8. IR spectra of Complex 2.
